# Supplementary material for: Evaluation of genetic variation and host resistance to wheat stem rust pathogen (Puccinia graminis f. sp. tritici) in bread wheat (Triticum aestivum L.) varieties grown in Türkiye
Source: PeerJ. 2024 Jun 25;12:e17633. doi: 10.7717/peerj.17633 (PMC11212643; doi:10.7717/peerj.17633)
Supplement: Supplemental Information 1 [file peerj-12-17633-s001.xlsx]

## Sheet: Sheet1
		Resistance genes								Resistance at adult plant
										2020		2021
No	Variety	Sr22	Sr24	Sr25	Sr26	Sr31	Sr38	Sr50	Sr57	HR	CI	HR	CI
1	Sivas 111/33	-	-	-	-	-	-	-	+	10R	2	20R	4
2	İkizce 96	-	-	-	-	-	-	-	-	10MR	4	30MR	12
3	Mızrak	-	-	-	-	-	-	-	-	10R	2	20MR	8
4	Uzunyayla	-	-	-	-	-	-	-	-	70S	70	70S	70
5	Bayraktar 2000	-	-	-	-	-	-	-	-	90S	90	70S	60
6	Atlı-2002	-	-	-	-	-	-	-	+	5R	1	10R	2
7	Zencirci-2002	-	-	-	-	-	-	-	+	10R	2	20R	4
8	Eser	-	-	-	-	-	-	-	+	40MS	32	30MS	24
9	Seval	-	-	-	-	-	-	-	+	10R	2	20MR	8
10	Tosunbey	-	-	-	-	-	-	-	-	5R	1	20MR	8
11	Kenanbey	-	-	-	-	-	-	-	+	5R	1	10MR	4
12	2022-04-01	-	-	-	-	-	-	-	-	80S	80	70S	70
13	P 8-6	-	-	-	-	-	-	-	-	100S	100	90S	90
14	Melez	-	-	-	-	-	-	-	-	20MR	8	50MS	40
15	Ak 702	-	-	-	-	-	-	-	+	40MS	32	30MS	24
16	Sertak	-	-	-	-	-	-	-	+	30MS	24	30MS	24
17	Yayla 305	-	-	-	-	-	-	-	+	10MR	4	20MR	8
18	Porsuk-2800	-	-	-	-	-	-	-	-	30MS	24	50MS	40
19	Gerek 79	-	-	-	-	-	-	-	-	40MS	32	50MS	40
20	Atay-85	-	-	-	-	-	-	-	-	10MR	4	30MR	12
21	Kutluk 94	-	-	-	-	-	-	-	-	10MR	4	20MR	8
22	Kırgız 95	+	-	-	-	-	-	-	-	5R	1	10R	2
23	Sultan 95	-	-	-	-	-	-	-	+	5R	1	20R	4
24	Süzen 97	-	-	-	-	-	-	-	-	70S	70	60S	60
25	Yıldız 98	-	-	-	-	-	-	-	+	20MS	16	30MS	24
26	Harmankaya-99	-	-	-	-	-	-	+	-	10MR	4	10MR	4
27	Altay 2000	-	-	-	-	-	-	-	-	20MR	8	30MS	24
28	Çetinel 2000	-	-	-	-	-	+	-	+	20MR	8	10MR	4
29	Alpu 2001	-	-	-	-	-	-	-	+	20MS	16	20MS	16
30	Sönmez 2001	-	-	-	-	-	-	-	+	5R	1	20R	4
31	Soyer02	-	-	-	-	-	-	-	+	10MR	4	20MR	8
32	Müfitbey	-	-	-	-	-	-	-	-	10MR	4	20MR	8
33	Nacibey	-	-	+	-	-	-	-	-	5R	1	10R	2
34	ES 26	-	-	-	-	-	-	-	-	10MR	4	30MR	12
35	Yunus	-	-	-	-	-	-	-	+	40MS	32	50MS	40
36	Mesut	-	-	-	-	-	-	-	+	5R	1	20MR	8
37	Kınacı-97	-	-	-	-	-	-	-	-	10R	2	40MR	16
38	Karahan-99	-	-	-	-	-	-	-	+	60S	60	50MS	40
39	Bağcı-2002	-	-	-	-	-	-	-	-	60S	60	70S	70
40	Konya-2002	-	-	-	-	-	-	-	-	30MS	24	60MS	48
41	Ahmetağa	-	-	-	-	-	-	-	-	60MS	48	70S	70
42	Ekiz	-	-	+	-	-	-	-	+	20R	4	10R	2
43	Eraybey	-	-	-	-	-	-	-	+	5R	1	20R	4
44	Kırkpınar 79	-	-	-	-	-	-	-	+	20MR	8	10MR	4
45	Murat-1	-	-	+	-	-	-	-	-	5R	1	10R	2
46	Kate A-1	-	-	-	-	-	-	-	+	50MS	40	60MS	48
47	Pehlivan	-	-	-	-	-	-	-	+	30MS	24	50MS	40
48	Prostor	-	-	-	-	-	-	-	+	10R	2	20R	4
49	Saroz 95	-	-	-	-	-	-	-	+	90S	90	80S	80
50	Atilla-12	-	-	-	-	-	-	-	+	90S	90	70S	70
51	Saraybosna	-	-	-	-	-	-	-	+	90S	90	70S	70
52	Gelibolu	-	-	-	-	-	-	-	+	10R	2	20R	4
53	Tekirdağ	-	-	-	-	-	-	-	-	10R	2	20MR	8
54	Aldane	-	-	-	-	-	-	-	-	10R	2	10MR	4
55	Selimiye	-	-	-	-	-	-	-	+	5MR	2	10MR	4
56	Bereket	-	-	-	-	-	-	-	-	50S	50	70S	70
57	Saban	-	-	-	-	-	-	-	+	10R	2	20R	4
58	Lancer	-	-	-	-	-	-	+	-	10R	2	10R	2
59	Doğu 88	-	-	-	-	-	-	+	+	70S	70	70S	70
60	Karasu 90	-	-	-	-	-	-	-	+	80S	80	70S	70
61	Palandöken 97	-	-	-	-	-	-	+	-	80S	80	70S	70
62	Alparslan	-	-	-	-	-	-	-	-	70S	70	70S	70
63	Nenehatun	-	-	-	-	-	-	-	-	80S	80	70S	70
64	Daphan	-	-	-	-	-	-	-	+	10MS	8	20MS	16
65	Ayyıldız	-	-	-	-	-	-	-	+	5R	1	10R	2
66	Kırik	-	-	-	-	-	-	-	-	100S	100	80S	80
67	Karacadağ 98	-	-	-	-	-	-	-	-	70S	70	70S	70
68	Nurkent	-	-	-	-	-	-	-	+	20MS	16	20MS	16
69	Tekin	-	-	-	-	-	-	-	+	5R	1	10R	2
70	İnia 66	-	-	-	-	-	-	-	+	10MR	4	20MR	8
71	Bezostaja-1	-	-	+	-	-	-	-	+	5R	1	10R	2
72	Bandırma 97	-	-	-	-	-	-	-	+	0	0	0	0
73	Karacabey 97	-	-	-	-	+	-	-	+	10MR	4	10MR	4
74	Momtchill	-	-	-	-	-	-	-	+	5R	1	10MR	4
75	Beşköprü	-	-	+	-	-	-	-	+	10MR	4	20MR	8
76	Hanlı	-	-	-	-	-	-	-	+	10R	2	20R	4
77	Sakin	-	-	-	-	-	-	-	+	10MR	4	20MR	8
78	Özcan	-	-	-	-	-	-	-	+	5R	1	10MR	4
79	Cumhuriyet 75	-	-	-	-	-	-	-	-	30MR	12	50MS	40
80	Marmara 86	-	-	-	-	-	-	-	+	0	0	0	0
81	Kaklıç 88	-	-	-	-	-	-	-	+	10MS	8	30MS	24
82	Basri Bey 95	-	-	-	-	-	-	-	+	10MR	4	20MR	8
83	Kaşif Bey 95	-	-	-	-	-	-	-	+	10MR	4	5R	1
84	Gönen 98	-	-	-	-	-	-	-	+	5R	1	20MR	8
85	Ziyabey 98	-	-	-	-	-	-	-	-	60MS	48	50MS	40
86	Meta 2002	-	-	-	-	-	-	+	+	0	0	0	0
87	Alibey	-	-	-	-	-	-	-	+	10MS	8	30MS	24
88	Menemen	-	-	-	-	-	-	-	+	10MS	8	40MS	32
89	Çukurova 86	-	-	-	-	-	-	-	+	20MS	16	20MS	16
90	Doğankent 1	-	-	-	-	-	-	-	+	70S	70	60S	60
91	Seri 82	-	-	-	-	-	-	-	+	20MS	16	60S	60
92	Seyhan 95	-	-	-	-	-	-	-	-	70S	70	70S	70
93	Adana-99	-	-	-	-	-	-	-	+	80MS	64	50MS	40
94	Ceyhan-99	-	-	-	-	-	-	-	+	80MS	64	50MS	40
95	Pandas (Panda)	-	-	-	-	-	-	-	-	80S	80	70S	70
96	Yüreğir-89	-	-	-	-	-	-	+	-	50MS	40	40MS	32
97	Karatopak	-	-	-	-	-	-	-	+	10R	2	20R	4
98	Osmaniyem	-	-	-	-	-	-	-	+	10MR	4	20MR	8
99	Altın Başak	-	-	-	-	-	-	-	+	5R	1	10MR	4
100	Gökkan	-	-	-	-	-	-	-	+	5R	1	20MR	8
101	Seri 2013	-	-	-	-	-	-	-	+	10R	2	10MR	4
102	Yakamoz	-	-	-	-	-	-	-	-	50S	50	60S	60
103	Gemini	-	-	-	-	-	-	-	+	5R	1	10R	2
104	Köksal-2000	-	-	-	-	-	-	-	+	20MR	8	30MS	24
105	Genç 88	-	-	-	-	-	-	-	+	0	0	0	0
106	Özkan	-	-	-	-	-	-	+	+	30MR	12	20MS	16
107	Carisma	-	-	-	-	-	-	-	+	5R	1	20R	4
108	Esperia	-	-	-	-	-	-	-	-	30MS	24	50MS	40
109	Sagittario	-	-	-	-	-	-	-	-	40MS	32	50S	50
110	Bone de	-	-	+	-	-	-	-	-	10R	2	10R	2
111	Bora	-	-	-	-	-	-	-	+	0	0	0	0
112	Genesi	-	-	-	-	-	-	-	+	20MR	8	20MR	8
113	Syrena odes'ka	-	-	-	-	-	-	-	+	10R	2	20MR	8
114	Nota	-	-	-	-	-	-	-	+	5R	1	10MR	4
115	Yubileynaya	-	-	-	-	-	-	-	+	10MR	4	20MR	8
116	Galil	-	-	-	-	-	-	-	+	0	0	0	0
117	Özdemirbey-97	-	-	-	-	-	-	-	+	10MR	4	10MR	4
118	Pinzon	-	-	-	-	-	-	-	+	0	0	0	0
119	Flamura 85	-	-	-	-	-	-	-	+	0	0	0	0
120	Alka	-	-	-	-	-	-	+	-	0	0	0	0
121	Guadalupe	-	-	-	-	-	-	-	+	20MR	8	10MR	4
122	Tina	-	-	-	-	-	-	-	+	30MS	24	20MR	8
123	Tosun 144	-	-	-	-	-	-	-	+	5R	1	10MR	4
124	Krasunia odes'ka	-	-	-	-	-	-	-	+	20MR	8	30MR	12
125	Tanya	-	-	-	-	-	-	-	+	5MR	2	20MR	8
126	Dariel	-	-	-	-	-	-	-	+	10MR	4	20MS	16
127	Bancal	-	-	-	-	-	-	-	+	0	0	0	0
128	Nina	-	-	-	-	-	-	-	+	20MR	8	20MS	16
129	Mihelca	-	-	-	-	-	-	-	+	10MR	4	20MR	8
130	Prima	-	-	-	-	-	-	-	+	40MR	16	30MS	24
131	Segor	-	-	-	-	-	-	-	+	20MR	8	20MR	8
132	Colfiorito	-	-	-	-	-	-	-	+	10MR	4	30MR	12
133	Mane Nick	-	-	-	-	-	-	-	+	5R	1	5R	1
134	Vittorio	-	-	-	-	-	-	-	+	30MS	24	40MR	16
135	Quality	-	-	-	-	-	-	-	+	30MR	12	40MS	32
136	Adagio	-	-	-	-	-	-	-	+	20MR	8	20MR	8
137	Iridium	-	-	-	-	-	-	+	+	10MR	4	10MR	4
138	Geya I	-	-	-	-	-	-	-	+	10MR	4	20MR	8
139	Anapo	-	-	-	-	-	-	-	+	0	0	0	0
140	Rumeli	-	-	-	-	-	-	-	+	5MR	2	10MR	4
141	Turkuaz	-	-	-	-	-	-	-	+	10MR	4	20MR	8
142	Tekira	-	-	-	-	-	-	-	+	0	0	0	0
143	Nogal	-	-	-	-	-	-	-	+	10MR	4	10MR	4
144	Adelaide	-	-	-	-	-	-	-	-	60S	60	60S	60
145	Antille	-	-	-	-	-	-	-	-	60S	60	60S	60
146	Avorio	-	-	-	-	-	-	-	+	10MR	4	20MR	8
147	MV Suba	-	-	-	-	-	-	-	+	5MR	2	20MR	8
148	Aglika	-	-	-	-	-	-	-	+	10MR	4	20MS	16
149	İnci20	-	-	-	-	-	-	-	-	60S	60	70S	70
150	Hawk (Şahin)	-	-	-	-	-	-	-	-	50MS	40	60S	60
